# Supplementary material for: Are Raw Brassica Vegetables Healthier Than Cooked Ones? A Randomized, Controlled Crossover Intervention Trial on the Health-Promoting Potential of Ethiopian Kale
Source: PubMed Central journal article supplement (PMC6266411; doi:10.3390/nu10111622), 2018-11-02
Supplement: nutrients-10-01622-s001.pdf [file nutrients-10-01622-s001.pdf]

**Table S1. Phenolic compounds in µg/g dry mass of raw and cooked *B. carinata* leaves.**  
Values in bold indicate statistical significant difference ( $p \leq 0.05$ ).

|                                                              | raw            | cooked         |
|--------------------------------------------------------------|----------------|----------------|
| Caffeoylquinic acid (chlogensaeure)                          | <b>47±2</b>    | <b>38±2</b>    |
| 5-p-coumaroylquinic acid                                     | 90±40          | 43±5           |
| Quercetin-3-O-sophoroside-7-O-D-glucoside                    | 49±20          | 38±28          |
| p-coumaroyl-glycoside                                        | 211±123        | 156±122        |
| Kaempferol-3-O-sophoroside-7-O-D-glucoside                   | <b>123±117</b> | <b>473±131</b> |
| Kaempferol-3-O-sophoroside-7-O-diglucoside                   | 27±25          | 66±9           |
| Isorhamnetin-3-O-D-glucoside-7-O-D-glucoside                 | 184±91         | 132±29         |
| Kaempferol-3-O-hydroxyferuoyl-sophoroside-7-O-D-diglucoside  | 411±86         | 347±31         |
| Kaempferol-3-O-hydroxyferuoyl-sophoroside-7-O-D-glucoside    | 756±157        | 639±57         |
| Kaempferol-3-O-caffeoyl-sophoroside-7-O-D-glucoside          | 308±41         | 160±129        |
| Isorhamnetin-3-O-hydroxyferuloyl-sophoroside-7-O-glucoside   | 124±46         | 219±173        |
| Isorhamnetin-3-O-caffeoyl-sophoroside-7-O-diglucoside        | 129±82         | 119±24         |
| Isorhamnetin-3-O-hydroxyferuloyl-sophoroside-7-O-diglucoside | 191±26         | 235±139        |
| Kaempferol-3-O-D-glucoside-7-O-D-glucoside                   | 162±202        | 54±38          |
| Kaempferol-3-O-sinapoyl-sophoroside-7-O-diglucoside          | 326±150        | 197±33         |
| Kaempferol-3-O-feruloyl-sophoroside-7-O-diglucoside          | <b>280±45</b>  | <b>77±6</b>    |
| Isorhamnetin-3-O-caffeoyl-sophoroside-7-O-D-glucoside        | 773±123        | 1058±210       |
| Kaempferol-3-O-sinapoyl-sophoroside-7-O-D-glucoside          | 457±41         | 280±180        |
| Kaempferol-3-O-feruloyl-sophoroside-7-O-D-glucoside          | 36±5           | 190±278        |
| Kaempferol-3-O-coumaroyl-sophoroside-7-O-D-glucoside         | 52±4           | 166±157        |
| Isorhamnetin-3-O-sinapoyl-sophoroside-7-O-glucoside          | 67±8           | 63±2           |
| Isorhamnetin-3-O-feruloyl-sophoroside-7-O-glucoside          | 29±4           | 71±62          |
| Isorhamnetin-3-O-coumaroyl-sophoroside-7-O-glucoside         | 55±9           | 66±4           |
| Isorhamnetin-3-O-sophoroside                                 | 21±0           | 21±0           |

|                                                        |               |              |
|--------------------------------------------------------|---------------|--------------|
| Kaempferol-3-O-hydroxyferuloyl-sophoroside             | <b>25±8</b>   | <b>9±4</b>   |
| Isorhamnetin-3-O-sophoroside                           | 21±0          | 21±0         |
| Kaempferol-3-O-caffeoyl-sophoroside                    | 4±0           | 4±0          |
| Kaempferol-3-O-sophoroside-7-sinapoyl-glucoside        | 84±88         | 77±19        |
| Kaempferol-3-O-sinapoyl-sophoroside                    | 4±0           | 4±0          |
| Kaempferol-3-O-feruloyl-sophoroside                    | 4±0           | 4±0          |
| Quercetin-3-O-disinapoyl-triglucoside-7-O-D-glucoside  | <b>221±19</b> | <b>172±8</b> |
| Kaempferol-3-O-disinapoyl-triglucoside-7-O-D-glucoside | <b>373±37</b> | <b>268±5</b> |
| Disinapoyl-gentiobioside                               | <b>77±3</b>   | <b>46±0</b>  |
| Sinapoyl-feruloyl-gentiobiose                          | <b>65±4</b>   | <b>43±1</b>  |
| Trisinapoyl-gentiobioside                              | 41±10         | 34±3         |
| Disinapoyl-feruloyl-gentiobiose                        | 36±8          | 31±0         |

**Table S2. Special GLS/ITC-free and polyphenol-reduced diet.****A: Vegetables and fruits to be avoided during wash out period**

| <b>Vegetable or fruit</b>           | <b>Scientific name</b>                                                                                                           |
|-------------------------------------|----------------------------------------------------------------------------------------------------------------------------------|
| Leaf mustards                       | <i>Brassica carinata</i> , <i>B. juncea</i> , <i>B. perviridis</i> , <i>B. narinosa</i> , <i>B. nigra</i> , <i>B. campestris</i> |
| Cauliflower                         | <i>Brassica oleracea</i> var. <i>botrytis</i>                                                                                    |
| Broccoli                            | <i>Brassica oleracea</i> var. <i>italica</i>                                                                                     |
| Watercress                          | <i>Nasturtium officinale</i>                                                                                                     |
| Chinese cabbage                     | <i>Brassica rapa</i> ssp. <i>pekinensis</i>                                                                                      |
| Garden cress                        | <i>Lepidium sativum</i>                                                                                                          |
| Kale                                | <i>Brassica oleracea</i> var. <i>sabellica</i>                                                                                   |
| Herb turnip                         | <i>Brassica rapa</i> ssp. <i>rapa</i>                                                                                            |
| Caper                               | <i>Capparis spinosa</i>                                                                                                          |
| Nasturtium                          | <i>Tropaeolum</i> L.                                                                                                             |
| Kohlrabi                            | <i>Brassica oleracea</i> var. <i>gongylodes</i>                                                                                  |
| Turnip                              | <i>Brassica napus</i> ssp. <i>rapifera</i>                                                                                       |
| Cabbage                             | <i>Brassica oleracea</i> var. <i>capitata</i>                                                                                    |
| White turnip                        | <i>Brassica rapa</i> ssp. <i>rapa</i>                                                                                            |
| Horseradish                         | <i>Armoracia rusticana</i>                                                                                                       |
| Mizuna                              | <i>Brassica rapa</i> var. <i>japonica</i>                                                                                        |
| Green Chinese cabbage (Pak Choi)    | <i>Brassica rapa</i> ssp. <i>chinensis</i>                                                                                       |
| Papaya                              | <i>Carica papaya</i>                                                                                                             |
| Radish                              | <i>Raphanus sativus</i> var. <i>sativus</i>                                                                                      |
| Rape (rape seed or oil or leaves)   | <i>Brassica napus</i>                                                                                                            |
| Bunch or Japanese radish            | <i>Raphanus sativus</i> var. <i>niger</i>                                                                                        |
| Brussels sprouts                    | <i>Brassica oleracea</i> var. <i>gemmifera</i>                                                                                   |
| Red cabbage                         | <i>Brassica oleracea</i> var. <i>capitata</i> var. <i>rubra</i>                                                                  |
| Turnip greens                       | <i>Brassica rapa</i> var. <i>rapa</i>                                                                                            |
| Rocket (broad, thick leaf)          | <i>Diplotaxis muralis</i>                                                                                                        |
| Rocket (arugula)                    | <i>Eruca sativa</i> (früher: <i>Rucola coltivata</i> )                                                                           |
| Rocket (narrow-leaved, wild rocket) | <i>Diplotaxis tenuifolia</i>                                                                                                     |
| Mustards                            | <i>Sinapis</i> L.                                                                                                                |
| White cabbage                       | <i>Brassica oleracea</i> var. <i>capitata</i> var. <i>alba</i>                                                                   |
| Savoy cabbage                       | <i>Brassica oleracea</i> var. <i>sabauda</i>                                                                                     |

## **B: Permitted meals during the intervention period**

### **Foods**

White flour bread or buns  
Pasta (durum wheat)  
Rice, semolina, barley  
Potatoes (peeled) and potato products  
Meat and Fish  
Eggs (maximum 2 per day)  
Sausage (moderate)  
Cheese (moderate), fresh cheese  
Quark, yoghurt (natural)  
Honey  
Spices (moderate)  
Cucumber (peeled)  
Pretzel salt sticks  
Rice waffles  
Butter cookies

### **Drinks**

Water  
250ml coffee or tea per day (= approx. 2 cups or 1 mug; also decaffeinated coffee counts!)  
Sodas (not caffeinated, without added vitamins)  
Milk (moderate)
